# Supplementary material for: Characterization of an α-Amylase from the Honeybee Chalk Brood Pathogen Ascosphaera apis
Source: MDPI journal article supplement (doi:10.3390/jof9111082), 2023-11-05
Supplement: s1 [file s1]

## Supplementary Material

### Characterization of an $\alpha$ -amylase from the honey bee chalk brood pathogen *Ascosphaera apis*

Jincheng Li, Sen Li, Chenjie Yang, Nemat O. Keyhani, Huili Pu, Longbin Lin, Xiaoxia Li, Peisong Jia, Dongmei Wu, Jieming Pan, Philip C Stevenson, G Mandela Fernández-Grandon, Liaoyuan Zhang, Yuxi Chen, Xiayu Guan\*, Junzhi Qiu\*

**Correspondence:** Xiayu Guan: [000q021008@fafu.edu.cn](mailto:000q021008@fafu.edu.cn); Junzhi Qiu: [000q120055@fafu.edu.cn](mailto:000q120055@fafu.edu.cn).

#### 1 Supplementary Data

##### 1.1 Supplementary Tables

**Table S1.** Plackett-Burman design matrix and results of screening of variables affecting amylase activity by *A. apis*

| Run | X <sub>1</sub> | X <sub>2</sub> | X <sub>3</sub> | X <sub>4</sub> | X <sub>5</sub> | X <sub>6</sub> | X <sub>7</sub> | X <sub>8</sub> | Amylase activity (U/mL) |
|-----|----------------|----------------|----------------|----------------|----------------|----------------|----------------|----------------|-------------------------|
| 1   | 1              | -1             | 1              | -1             | -1             | -1             | 1              | 1              | 30.95 (1.47)            |
| 2   | 1              | 1              | -1             | 1              | -1             | -1             | -1             | 1              | 34.60 (2.01)            |
| 3   | -1             | 1              | 1              | -1             | 1              | -1             | -1             | -1             | 30.32 (1.58)            |
| 4   | 1              | -1             | 1              | 1              | -1             | 1              | -1             | -1             | 37.92 (0.83)            |
| 5   | 1              | 1              | -1             | 1              | 1              | -1             | 1              | -1             | 35.69 (0.72)            |
| 6   | 1              | 1              | 1              | -1             | 1              | 1              | -1             | 1              | 30.24 (0.96)            |
| 7   | -1             | 1              | 1              | 1              | -1             | 1              | 1              | -1             | 32.78 (1.15)            |
| 8   | -1             | -1             | 1              | 1              | 1              | -1             | 1              | 1              | 30.42 (1.17)            |
| 9   | -1             | -1             | -1             | 1              | 1              | 1              | -1             | 1              | 32.85 (2.19)            |
| 10  | 1              | -1             | -1             | -1             | 1              | 1              | 1              | -1             | 33.94 (1.61)            |
| 11  | -1             | 1              | -1             | -1             | -1             | 1              | 1              | 1              | 24.97 (1.04)            |
| 12  | -1             | -1             | -1             | -1             | -1             | -1             | -1             | -1             | 35.93 (1.82)            |

X<sub>3</sub> and X<sub>6</sub> for amylase activity were dummy factors. Other codes were the variables of the medium to be optimized. X<sub>1</sub>, X<sub>2</sub>, X<sub>4</sub>, X<sub>5</sub>, X<sub>7</sub> and X<sub>8</sub> were maltose, yeast powder, CaCl<sub>2</sub>, ZnCl<sub>2</sub>, vitamin E and pH, respectively. Values for amylase are means (SE) of three replicate flasks.

**Table S2.** The range and the level of variables independently tested in BBD for *A. apis* amylase activity

| Code           | Variable for amylase activity | Level(g/L) |      |      |
|----------------|-------------------------------|------------|------|------|
|                |                               | -1         | 0    | 1    |
| X <sub>1</sub> | Maltose                       | 45.5       | 46   | 46.5 |
| X <sub>2</sub> | CaCl <sub>2</sub>             | 1.44       | 1.49 | 1.54 |
| X <sub>3</sub> | pH                            | 6.4        | 6.6  | 6.8  |

**Table S3.** The matrix of Box–Behnken design for optimization of *A. apis* amylase activity. Values for amylase activity are means (SE) of three replicate flasks

| Run | X <sub>1</sub> | X <sub>2</sub> | X <sub>3</sub> | Amylase activity (U/mL) |
|-----|----------------|----------------|----------------|-------------------------|
| 1   | -1             | -1             | 0              | 39.64 (2.12)            |
| 2   | -1             | 1              | 0              | 37.15 (1.68)            |
| 3   | 1              | -1             | 0              | 32.10 (1.43)            |
| 4   | 1              | 1              | 0              | 44.05 (2.27)            |
| 5   | 0              | -1             | -1             | 33.10 (1.54)            |
| 6   | 0              | -1             | 1              | 42.13 (1.79)            |
| 7   | 0              | 1              | -1             | 42.09 (1.56)            |
| 8   | 0              | 1              | 1              | 36.03 (2.11)            |
| 9   | -1             | 0              | -1             | 42.49 (2.05)            |
| 10  | 1              | 0              | -1             | 33.37 (1.42)            |
| 11  | -1             | 0              | 1              | 35.05 (1.87)            |
| 12  | 1              | 0              | 1              | 37.09 (1.63)            |
| 13  | 0              | 0              | 0              | 46.15 (2.04)            |
| 14  | 0              | 0              | 0              | 46.10 (1.91)            |
| 15  | 0              | 0              | 0              | 45.71 (2.18)            |

**Table S4.** ANOVA for response surface quadratic model of amylase activity

| Source        | DF     | SS             | MS       | F        | Pr > F |
|---------------|--------|----------------|----------|----------|--------|
| Model         | 9      | 329.6894       | 36.63216 | 11.22671 | 0.0080 |
| Error         | 5      | 16.31473       | 3.262947 |          |        |
| (Lack of fit) | 3      | 16.20041       | 5.400137 | 94.47234 | 0.0105 |
| (Pure Error)  | 2      | 0.114322       | 0.057161 |          |        |
| Total         | 14     | 346.0042       |          |          |        |
| $R^2$         | 0.9528 | Adjusted $R^2$ | 0.8680   |          |        |

1.2 Supplementary Figure

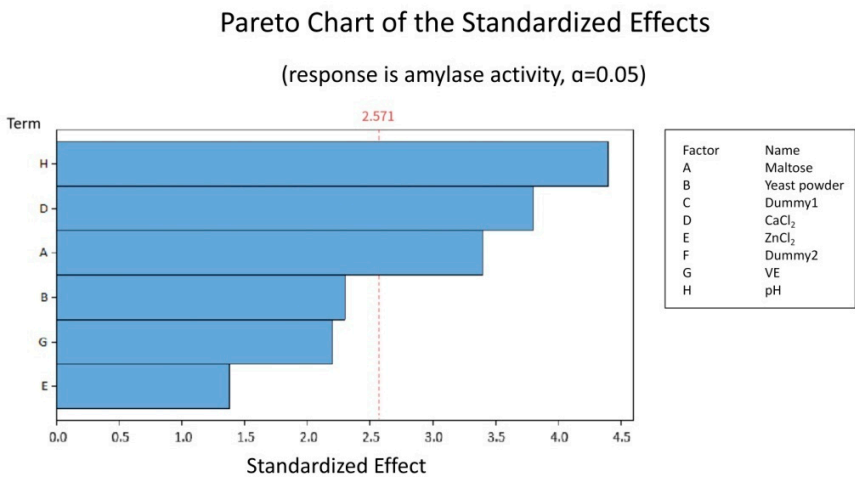

Figure S1 Pareto chart of the standardized effects for amylase activity.
